# Supplementary material for: The Burden of Hepatitis B, Hepatitis C, and Human Immunodeficiency Viruses in Ovarian Cancer Patients in Nairobi, Kenya
Source: MDPI journal article supplement (doi:10.3390/idr14030047), 2022-06-07
Supplement: s1 [file s1]

Supplementary materials

Table S1. Analysis of the ovarian cancer patients

| Study ID | Age | FIGO Stage | Surgery | Chemotherapy | HBV | HCV | HIV | HBV/HIV | HBV/HCV | HIV/HCV | Overall negativity |
|----------|-----|------------|---------|--------------|-----|-----|-----|---------|---------|---------|--------------------|
| 1        | 66  | late       | X       | √            | neg | neg | neg | neg     | neg     | neg     | neg                |
| 2        | 51  | late       | X       | √            | neg | neg | neg | neg     | neg     | neg     | neg                |
| 3        | 28  | late       | √       | √            | pos | neg | neg | neg     | neg     | neg     | pos                |
| 4        | 38  | late       | X       | √            | neg | neg | neg | neg     | neg     | neg     | neg                |
| 5        | 39  | late       | X       | √            | neg | neg | pos | neg     | neg     | neg     | pos                |
| 6        | 45  | late       | X       | √            | neg | neg | pos | neg     | neg     | neg     | pos                |
| 7        | 48  | late       | X       | √            | neg | neg | neg | neg     | neg     | neg     | neg                |
| 8        | 50  | late       | X       | X            | neg | neg | neg | neg     | neg     | neg     | neg                |
| 9        | 49  | late       | X       | √            | neg | neg | neg | neg     | neg     | neg     | neg                |
| 11       | 51  | late       | X       | √            | pos | neg | pos | pos     | neg     | neg     | pos                |
| 12       | 49  | late       | X       | √            | neg | neg | neg | neg     | neg     | neg     | neg                |
| 13       | 69  | late       | √       | √            | pos | neg | pos | pos     | neg     | neg     | pos                |
| 14       | 66  | late       | √       | √            | neg | neg | neg | neg     | neg     | neg     | neg                |
| 15       | 59  | late       | √       | √            | neg | neg | neg | neg     | neg     | neg     | neg                |
| 16       | 45  | late       | X       | √            | neg | neg | neg | neg     | neg     | neg     | neg                |
| 17       | 48  | late       | X       | √            | neg | neg | neg | neg     | neg     | neg     | neg                |
| 18       | 55  | late       | √       | √            | neg | neg | neg | neg     | neg     | neg     | neg                |
| 20       | 60  | early      | √       | √            | neg | neg | neg | neg     | neg     | neg     | neg                |
| 21       | 63  | late       | X       | √            | neg | neg | neg | neg     | neg     | neg     | neg                |
| 22       | 38  | late       | X       | √            | neg | neg | neg | neg     | neg     | neg     | neg                |
| 24       | 43  | late       | X       | √            | pos | neg | pos | pos     | neg     | neg     | pos                |
| 25       | 55  | late       | √       | √            | neg | neg | neg | neg     | neg     | neg     | neg                |
| 26       | 50  | late       | X       | √            | neg | neg | neg | neg     | neg     | neg     | neg                |
| 27       | 48  | late       | X       | √            | neg | neg | neg | neg     | neg     | neg     | neg                |
| 28       | 61  | late       | X       | √            | neg | neg | neg | neg     | neg     | neg     | neg                |
| 29       | 39  | early      | X       | √            | pos | neg | neg | neg     | neg     | neg     | pos                |

|    |    |       |   |   |     |     |     |     |     |     |     |
|----|----|-------|---|---|-----|-----|-----|-----|-----|-----|-----|
| 30 | 20 | early | √ | √ | neg |
| 31 | 65 | late  | X | √ | neg |
| 32 | 35 | early | √ | √ | neg |
| 34 | 81 | early | X | √ | neg |
| 35 | 45 | late  | √ | √ | pos | neg | neg | neg | neg | neg | pos |
| 36 | 29 | late  | X | √ | neg | neg | pos | neg | neg | neg | pos |
| 38 | 45 | late  | √ | √ | neg | neg | pos | neg | neg | neg | pos |
| 39 | 59 | early | X | X | pos | neg | pos | pos | neg | neg | pos |
| 40 | 60 | late  | √ | √ | pos | neg | pos | pos | neg | neg | pos |
| 41 | 27 | late  | √ | √ | neg |
| 43 | 73 | early | X | X | pos | neg | pos | pos | neg | neg | pos |
| 44 | 55 | late  | √ | √ | pos | neg | pos | pos | neg | neg | pos |
| 45 | 34 | late  | √ | √ | neg |
| 46 | 22 | late  | √ | √ | neg |
| 47 | 47 | early | √ | √ | neg |
| 48 | 48 | late  | X | X | pos | neg | pos | pos | neg | neg | pos |
| 49 | 65 | early | √ | X | neg |
| 50 | 55 | early | √ | √ | neg |
| 51 | 29 | late  | X | √ | neg |
| 52 | 34 | late  | X | √ | pos | neg | pos | pos | neg | neg | pos |
| 53 | 44 | late  | X | X | neg |
| 54 | 44 | late  | √ | √ | neg |
| 55 | 33 | late  | X | X | neg |
| 56 | 68 | late  | X | X | pos | neg | neg | neg | neg | neg | pos |
| 57 | 50 | late  | √ | √ | pos | neg | pos | pos | neg | neg | pos |
| 58 | 41 | early | X | √ | neg |
| 59 | 67 | late  | X | X | neg |
| 60 | 44 | late  | √ | √ | neg |
| 61 | 19 | early | √ | √ | pos | neg | neg | neg | neg | neg | pos |
| 63 | 45 | late  | √ | X | neg | neg | pos | neg | neg | neg | pos |
| 64 | 70 | late  | √ | √ | pos | neg | pos | pos | neg | neg | pos |

|     |    |       |   |   |     |     |     |     |     |     |     |
|-----|----|-------|---|---|-----|-----|-----|-----|-----|-----|-----|
| 65  | 70 | late  | √ | √ | pos | neg | pos | pos | neg | neg | pos |
| 66  | 68 | late  | √ | √ | pos | neg | pos | pos | neg | neg | pos |
| 67  | 33 | late  | X | X | pos | neg | neg | neg | neg | neg | pos |
| 68  | 65 | late  | X | X | neg |
| 69  | 62 | late  | X | √ | neg |
| 70  | 28 | late  | √ | √ | neg |
| 71  | 25 | early | X | X | neg |
| 72  | 69 | late  | X | X | neg |
| 73  | 72 | late  | X | X | neg |
| 75  | 67 | late  | X | √ | pos | neg | neg | neg | neg | neg | pos |
| 76  | 68 | late  | X | √ | pos | neg | neg | neg | neg | neg | pos |
| 77  | 65 | late  | X | √ | neg |
| 79  | 79 | early | X | √ | neg |
| 80  | 52 | late  | X | X | neg | neg | pos | neg | neg | neg | pos |
| 81  | 38 | early | X | X | neg | pos | neg | neg | neg | neg | pos |
| 82  | 50 | late  | X | X | pos | neg | pos | pos | neg | neg | pos |
| 84  | 49 | late  | √ | √ | neg |
| 85  | 52 | late  | X | √ | pos | neg | neg | neg | neg | neg | pos |
| 86  | 74 | late  | √ | √ | pos | neg | neg | neg | neg | neg | pos |
| 87  | 76 | late  | √ | √ | neg |
| 88  | 28 | late  | √ | √ | pos | neg | pos | pos | neg | neg | pos |
| 89  | 80 | late  | √ | X | neg |
| 10c | 24 | late  | √ | √ | neg |
| 2c  | 47 | late  | √ | √ | neg |
| 3ca | 60 | late  | √ | √ | neg | neg | pos | neg | neg | neg | pos |
| 4c  | 59 | late  | √ | √ | neg |
| 5c  | 21 | late  | X | √ | neg |
| 6c  | 52 | late  | √ | √ | neg |
| 7c  | 51 | late  | X | √ | neg | neg | pos | neg | neg | neg | pos |

Early stage (FIGO stage I and II), late stage (FIGO stage III and IV), √ (done surgery or taken chemotherapy), X (not done surgery or taken chemotherapy), neg (negative) and pos (positive)

Table S2. Analysis of the healthy control subjects

| Study ID | Age | HBV | HCV | HIV | HBV/HIV | HBV/HCV | HIV/HCV | Overall negativity |
|----------|-----|-----|-----|-----|---------|---------|---------|--------------------|
| 2        | 38  | neg | neg | neg | neg     | neg     | neg     | neg                |
| 3        | 74  | neg | neg | neg | neg     | neg     | neg     | neg                |
| 4        | 26  | neg | neg | neg | neg     | neg     | neg     | neg                |
| 5        | 39  | neg | neg | neg | neg     | neg     | neg     | neg                |
| 6        | 32  | neg | neg | neg | neg     | neg     | neg     | neg                |
| 7        | 28  | neg | neg | neg | neg     | neg     | neg     | neg                |
| 8        | 24  | neg | neg | neg | neg     | neg     | neg     | neg                |
| 9        | 18  | neg | neg | neg | neg     | neg     | neg     | neg                |
| 11       | 21  | neg | neg | neg | neg     | neg     | neg     | neg                |
| 12       | 28  | neg | neg | neg | neg     | neg     | neg     | neg                |
| 13       | 25  | neg | neg | neg | neg     | neg     | neg     | neg                |
| 14       | 49  | neg | neg | neg | neg     | neg     | neg     | neg                |
| 15       | 31  | neg | neg | neg | neg     | neg     | neg     | neg                |
| 16       | 53  | neg | neg | neg | neg     | neg     | neg     | neg                |
| 17       | 33  | neg | neg | neg | neg     | neg     | neg     | neg                |
| 18       | 59  | pos | neg | neg | neg     | neg     | neg     | pos                |
| 19       | 26  | neg | neg | neg | neg     | neg     | neg     | neg                |
| 20       | 56  | neg | neg | neg | neg     | neg     | neg     | neg                |
| 21       | 33  | neg | neg | neg | neg     | neg     | neg     | neg                |
| 22       | 34  | neg | neg | neg | neg     | neg     | neg     | neg                |
| 24       | 36  | neg | neg | neg | neg     | neg     | neg     | neg                |
| 25       | 34  | neg | neg | neg | neg     | neg     | neg     | neg                |
| 26       | 25  | neg | neg | neg | neg     | neg     | neg     | neg                |
| 27       | 40  | neg | neg | neg | neg     | neg     | neg     | neg                |
| 28       | 23  | neg | neg | neg | neg     | neg     | neg     | neg                |
| 29       | 47  | neg | neg | pos | neg     | neg     | neg     | pos                |
| 30       | 55  | neg | neg | neg | neg     | neg     | neg     | neg                |

|     |    |     |     |     |     |     |     |     |
|-----|----|-----|-----|-----|-----|-----|-----|-----|
| 31  | 30 | neg |
| 32  | 34 | neg |
| 33  | 34 | neg |
| 34  | 46 | neg |
| 35  | 50 | pos | neg | neg | neg | neg | neg | pos |
| 36  | 34 | neg |
| 39  | 50 | neg |
| 40  | 36 | neg |
| 41  | 56 | neg |
| 42  | 42 | neg |
| 43  | 37 | neg |
| 44  | 34 | neg |
| 45  | 47 | neg |
| 46  | 43 | neg |
| 11b | 27 | neg |
| 1b  | 30 | neg |
| 1H  | 25 | neg |
| 2H  | 49 | neg |
| 3H  | 35 | neg |
| 4H  | 46 | neg |
| 5H  | 47 | neg |
| 6H  | 33 | neg |
| 7H  | 42 | neg | neg | pos | neg | neg | neg | pos |

---

neg (negative) and pos (positive)
